# Supplementary material for: Facile one-step hydrothermal synthesis of monolayer and turbostratic bilayer n-doped graphene quantum dots using sucrose as a carbon source
Source: Royal Society of Chemistry journal article supplement (doi:10.1039/d3ra04402e), 2023-01-01
Supplement: d3ra04402e1.pdf [file d3ra04402e1.pdf]

## Supporting Information

### Facile one-step hydrothermal synthesis of monolayer and turbostratic bilayer n-doped graphene quantum dots using sucrose as a carbon source

Akkawat Ruammaitree <sup>a,b,\*</sup>, Kanyaporn Praphanwong <sup>a</sup> and Arunocha Taiphol <sup>a</sup>

<sup>a</sup> Department of physics, Faculty of Science and Technology, Thammasat University, Pathum Thani 12120, Thailand.

<sup>b</sup> Thammasat University Research Unit in Synthesis and Applications of Graphene, Thammasat University, Pathum Thani 12120, Thailand

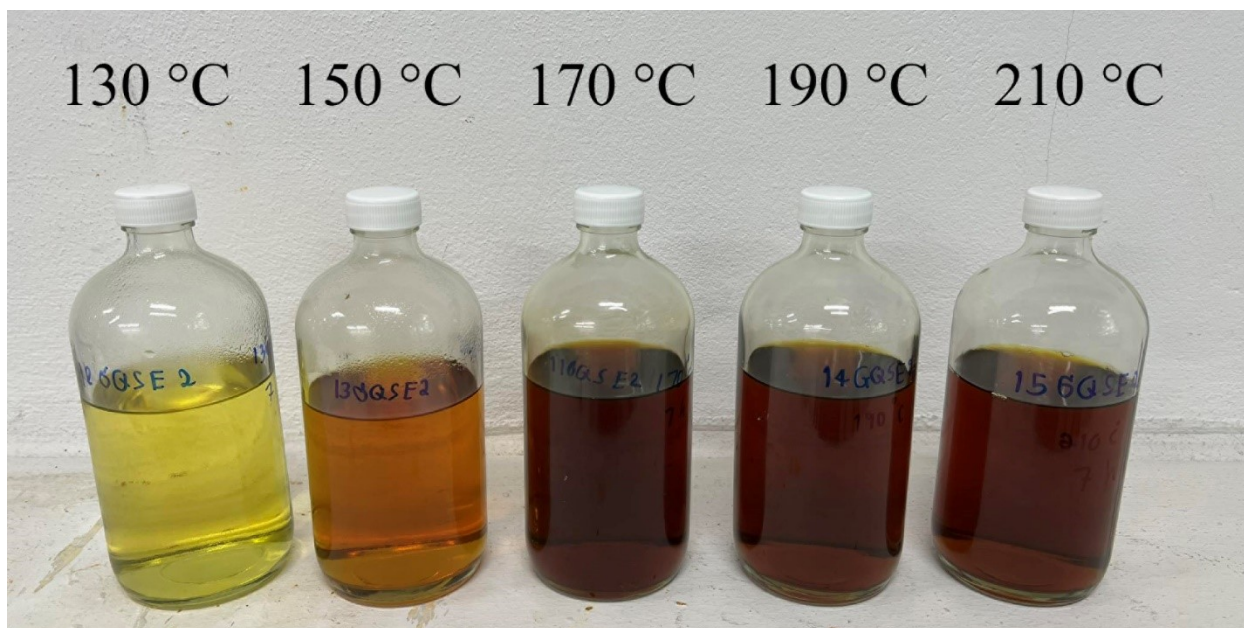

Figure S1 Photograph of NGQDs which prepared by hydrothermal at various temperatures.

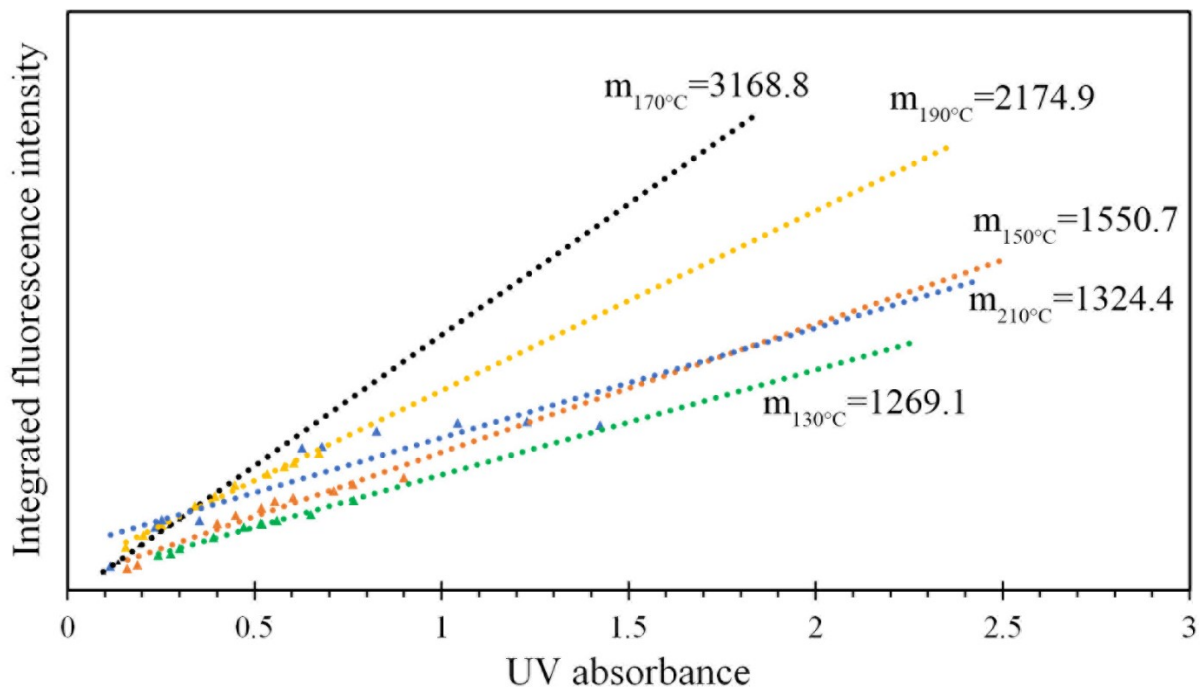

Figure S2 Relationship between integrated fluorescence intensity and UV absorbance of the NGQDs which prepared by hydrothermal at 130 °C, 150 °C, 170 °C, 190 °C and 210 °C using the excitation and absorbance wavelength of 360 nm.

Table S1 Relative yield of NGQDs which were synthesized by hydrothermal at various temperatures.

| Type  | Temperature (°C) | slope (m) | Relative yield to GQDs (times) |
|-------|------------------|-----------|--------------------------------|
| GQDs  | 170              | 648       | 1.0                            |
| NGQDs | 130              | 1269.1    | 2.0                            |
|       | 150              | 1550.7    | 2.4                            |
|       | 170              | 3168.8    | 4.9                            |
|       | 190              | 2174.9    | 3.4                            |
|       | 210              | 1324.4    | 2.0                            |

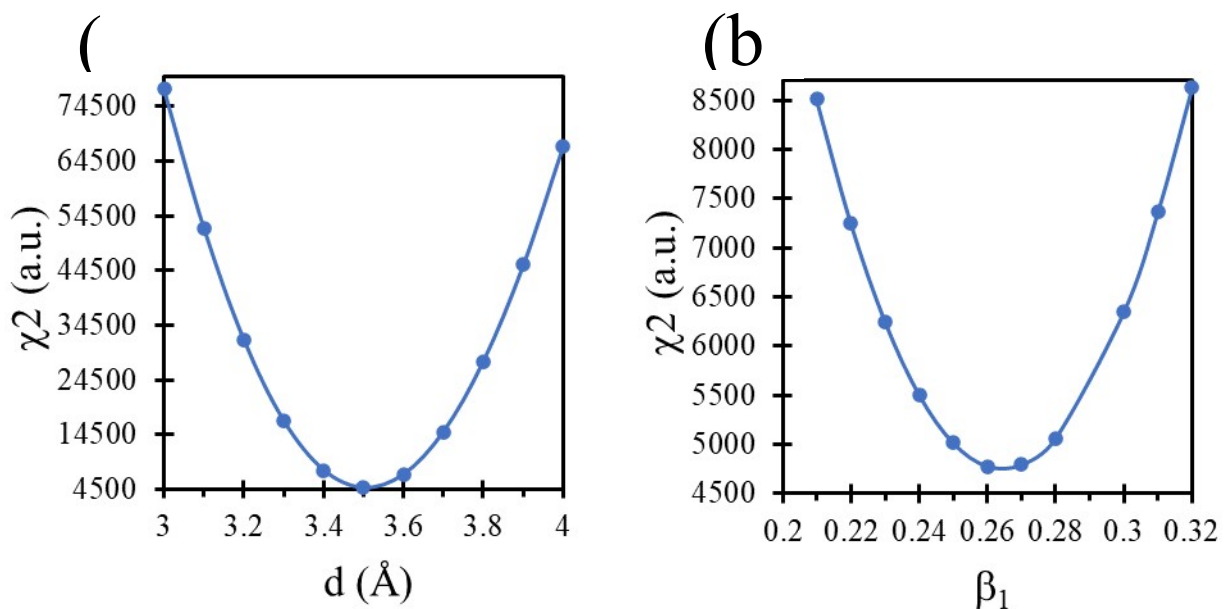

Figure S3 the chi-squared ( $\chi^2$ ) dependence on (a) interlayer spacing ( $d$ ) and (b) occupancy ( $\beta_1$ ) parameters for NGQDs

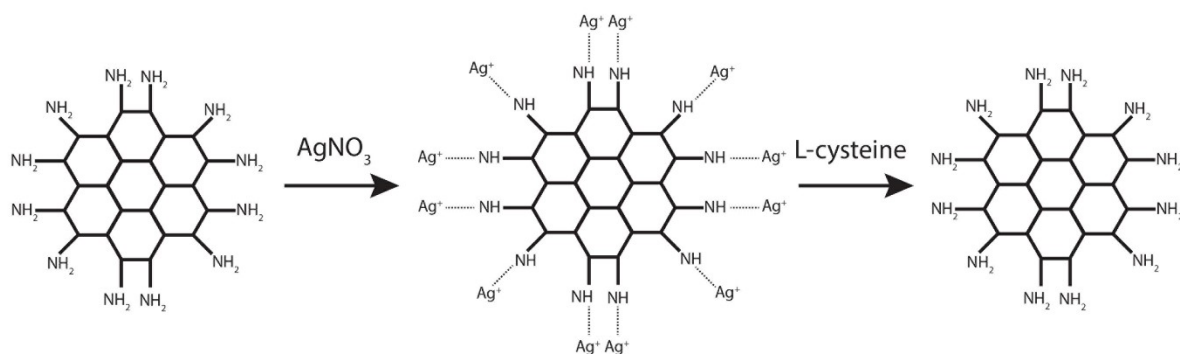

Figure S4 Schematic of the structure of NGQDs after addition of AgNO<sub>3</sub> and L-cysteine, respectively.
